# Supplementary material
Source: MDPI journal article supplement (https://www.mdpi.com/2071-1050/8/1/14)
Supplement: s1 [file s1]

# Supplementary Materials: An Index to Measure Sustainability of a Business Project in the Construction Industry: Lithuanian Case

Nomeda Dobrovolskienė \* and Rima Tamošiūnienė

Table S1. Initial list of criteria.

| Dimension               | Initial List of Criteria                      | The Mean Value |
|-------------------------|-----------------------------------------------|----------------|
| Economic                | Construction time                             | 4.6            |
|                         | Defects and damages                           | 2.3            |
|                         | Disposal costs                                | 2.4            |
|                         | Durability                                    | 2.8            |
|                         | Flexibility (adaptability)                    | 1.3            |
|                         | Initial construction costs                    | 2.8            |
|                         | Integration of building services              | 1.2            |
|                         | Integration of supply chains                  | 1.5            |
|                         | Labour costs                                  | 2.6            |
|                         | Life-cycle costs                              | 1.7            |
|                         | Maintenance costs                             | 3.9            |
|                         | Material costs                                | 2.7            |
|                         | Plan maintenance                              | 2.9            |
|                         | Project revenue                               | 2.9            |
|                         | Quality control                               | 2.7            |
|                         | Reduction of direct costs                     | 4.9            |
|                         | Reduction of indirect costs                   | 4.8            |
|                         | Synergies with the other projects             | 2.7            |
| Environmental           | CO <sub>2</sub> emission                      | 2.7            |
|                         | Ecology damages                               | 1.4            |
|                         | Energy consumption                            | 4.7            |
|                         | Energy efficiency in building use             | 2.8            |
|                         | Environmental incidents                       | 1.1            |
|                         | Equipment and materials with ecological label | 1.4            |
|                         | GHG emission                                  | 4.4            |
|                         | Material consumption                          | 2.4            |
|                         | Noise reduction                               | 1.0            |
|                         | Odours                                        | 1.3            |
|                         | Particulate emissions and dust reduction      | 2.4            |
|                         | Protection flora and fauna                    | 2.0            |
|                         | Protection of water resources                 | 1.2            |
|                         | Soil consumption                              | 2.9            |
|                         | Use of durable materials                      | 3.3            |
|                         | Use of materials with the low health risk     | 3.9            |
|                         | Use of recycled materials                     | 1.3            |
|                         | Use of regional material                      | 1.2            |
| Use of renewable energy | 3.5                                           |                |
| Ventilation             | 1.7                                           |                |
| Waste management        | 2.8                                           |                |
| Water consumption       | 4.3                                           |                |
| Water savings           | 2.8                                           |                |

**Table S1. Cont.**

| <b>Dimension</b> | <b>Initial List of Criteria</b>                              | <b>The Mean Value</b> |
|------------------|--------------------------------------------------------------|-----------------------|
|                  | Community disturbance                                        | 1.2                   |
|                  | Impact on the global community                               | 1.0                   |
|                  | Influence on job market                                      | 1.2                   |
|                  | Labour availability                                          | 2.3                   |
|                  | Leadership/Knowledge management                              | 3.6                   |
|                  | Local workers during construction. operation and maintenance | 3.2                   |
|                  | Project declared of general interest                         | 3.0                   |
| Social           | Public access                                                | 1.0                   |
|                  | Public participation and control over the project            | 1.0                   |
|                  | Safety and health of workers                                 | 4.0                   |
|                  | Satisfaction of society                                      | 2.0                   |
|                  | Security of the infrastructure                               | 1.2                   |
|                  | Technical and environmental training                         | 2.9                   |
|                  | Traffic congestion                                           | 1.0                   |
|                  | Training of workers                                          | 3.5                   |
